# Supplementary material for: Attachment-based Prevention Program Involving Mothers and Fathers: Seven-year Post-Intervention Outcomes of a Randomized Control Trial
Source: Springer Nature journal article supplement (doi:10.1007/s10826-023-02762-2), 2024-02-01
Supplement: MOESM1 [file 26695960]

| Table. Demographics for mothers and fathers who completed T1 and who completed T2 | | | | | |
| --- | --- | --- | --- | --- | --- |
|  |  | SAFE | | CG | |
|  |  | Mothers | Fathers | Mothers | Fathers |
| Age at childbirth | Completed T1 | *M* = 33.15 (*SD* = 7.59) | *M* = 34.94 (*SD* = 7.23) | *M* = 32.54 (*SD* = 5.51) | *M* = 35.81 (*SD* = 7.52) |
| Completed T2 | M = 34.47 (*SD* = 4.08) | *M* = 37.70 (*SD* = 4.94) | *M* = 35.49 (*SD* = 4.23) | *M* = 37.58 (*SD* = 6.13) |
| Nationality German | Completed T1 | 83.3% | 84.8% | 91.2% | 92.6% |
| Completed T2 | 86.1% | 97.0% | 87.1% | 90.5% |
| Educational level | Completed T1 | *M* = 3.02 | *M* = 3.24 | *M* = 3.31 | *M* = 3.26 |
| Completed T2 | *M* = 3.81 | *M* = 3.52 | *M* = 3.84 | *M* = 3.81 |
| *Note.* T1 = Time one, T2 = Time 2; Educational level has been coded according to the German school system: 0 = no graduation; 1 = nine school years; 2 = ten school years; 3 = 13 school years; 4 = university degree | | | | | |
